# Supplementary material
Source: HighWire-hosted journal article supplement (https://www.ijssurgery.com/content/16/3/427)
Supplement: inline-supplementary-material-1 [file inline-supplementary-material-1.docx]

Appendix A

| Code | Description |
| --- | --- |
| ICD-9-CM Codes |  |
| 737.00, 737.10, 737.11, 737.12, 737.19, 737.30, 737.31, 737.32, 737.33, 737.34, 737.39, 737.40, 737.41, 737.41, 737.42, 737.43, 737.8, 737.9, 756.19 | Spinal Deformity Diagnoses |
| 81.06, 81.07, 81.08, 81.64 | 8+ Level Lumbar Fusions |
| CPT Codes |  |
| 22800, 22802, 22804, 22808, 22810, 22812, 22818, 22819 | Thoracolumbar ASD Correction Procedures |
| 22843, 22844, 22846, 22847 | Long Fusion-Hardware Construct Procedures |
| 22842, 22845 | Short Fusion-Hardware Construct Procedures |
| 22110, 22112, 22114, 22116, 22206, 22207, 22208, 22210, 22212, 22214, 22216, 22220, 22222, 22224, 22226 | Excision and Osteotomy |
| 22849, 22850, 22852, 22855 | Removal of Instrumentation |
| 22840 – 22848 | Instrumentation Procedures |
| 22551, 22853, 22554, 22556, 22558, 22585, 22586, 22630, 22632, 22633, 22634, 22859, 22867, 22868, 22869, 22870 | Fusion |
| 63075, 63076, 63077, 63078, 63081, 63082, 63085, 63086, 63087, 63088, 63090, 63091, 22220, 22222, 22224, 22226 | Anterior Decompression |
| 22100, 22101, 22102, 22103, 63030, 63035, 63003, 63016, 63005, 63017, 63047, 63046, 63048, 63042, 63044 | Posterior Decompression |
| 22532, 22533, 22534, 22590, 22595, 22600, 22610, 22612, 22614, 22630, 22632, 22633, 22634, 22840, 22800, 22842, 22802, 22843, 22844 | Posterior Number of Levels Fused |
| 22548, 22551, 22552, 22554, 22556, 22558, 225585, 22586, 22808, 22845, 22810, 22846, 22812, 22847 | Anterior Number of Levels Fused |
